# Supplementary material for: Renal Safety of Hydroxyethyl starch 130/0.42 After Cardiac Surgery: A Retrospective Cohort Analysis
Source: PubMed Central journal article supplement — Drug Saf. 2021 Sep 26;44(12):1311–21. doi: 10.1007/s40264-021-01116-5 (PMC8626393; doi:10.1007/s40264-021-01116-5), 2021-09-26
Supplement: 40264_2021_1116_MOESM1_ESM.pdf [file 40264_2021_1116_MOESM1_ESM.pdf]

**Renal safety of hydroxyethyl starch 130/0.42 after cardiac surgery: A retrospective cohort analysis**

Benedict Morath<sup>1,2,3\*</sup>, Andreas. D. Meid<sup>1\*</sup>, Johannes Rickmann<sup>4</sup>, Jasmin Soethoff<sup>5</sup>, Markus Verch<sup>5</sup>, Matthias Karck<sup>5</sup>, Marcin Zaradzki<sup>5‡</sup>

\*both authors contributed equally and should be considered joint first author

Affiliations:

<sup>1</sup>Department of Clinical Pharmacology and Pharmacoepidemiology, Heidelberg University Hospital, Heidelberg, Germany

<sup>2</sup>Cooperation Unit Clinical Pharmacy, Heidelberg University, Heidelberg, Germany

<sup>3</sup>Hospital Pharmacy, Heidelberg University Hospital, Heidelberg, Germany

<sup>4</sup>Center for Information and Medical Technology, Heidelberg University Hospital, Heidelberg, Germany

<sup>5</sup>Department of Cardiac Surgery, University Hospital Heidelberg, Heidelberg, Germany

‡ Correspondence to:

Dr. med. Marcin Zaradzki, MD  
Tel: +49 6221 56 34799  
E-Mail: marcin.zaradzki@med.uni-heidelberg.de

**Table S1:** Variables extracted during the retrospective analysis, the corresponding units and operationalization, the definition and measurement, and the data source.

|                      | <b>Variable</b>             | <b>Unit/<br/>Operationalization</b> | <b>Definition&amp; Measurement</b>                                                                                                                                    | <b>Data source</b>       |
|----------------------|-----------------------------|-------------------------------------|-----------------------------------------------------------------------------------------------------------------------------------------------------------------------|--------------------------|
| <b>Patient</b>       | Age                         | n/a                                 | Taken as reported in the electronic health record.                                                                                                                    | Electronic health record |
|                      | Sex                         | Male/female                         | Taken as reported in the electronic health record.                                                                                                                    | Electronic health record |
|                      | 90-Day mortality            | Binary yes/no                       | Patient death within 90 days from surgery. Measured during 90 day follow-up and documented in electronic health record.                                               | Electronic health record |
| <b>Comorbidities</b> |                             |                                     |                                                                                                                                                                       |                          |
| <b>Comorbidities</b> | Atrial fibrillation         | Binary yes/no                       | A reported persistent, intermittent, or chronic atrial fibrillation was defined as an atrial fibrillation.                                                            | Electronic health record |
|                      | Body mass index             | n/a                                 | Calculated from the patient's weight at admission and the patient's height.                                                                                           | Electronic patient char  |
|                      | Current or previous smoking | Binary yes/no                       | Current smoking or reported previous smoking as reported in the electronic health record.                                                                             | Electronic patient char  |
|                      | Diabetes                    | Binary yes/no                       | A reported Typ I or Typ II diabetes without treatment, treated with insulin or oral medication, or treated by dietary measures was defined as diabetes.               | Electronic health record |
|                      | Hyperlipidemia              | Binary yes/no                       | Defined as a reported hyperlipidemia in the electronic health record.                                                                                                 | Electronic health record |
|                      | Hypertension                | Binary yes/no                       | Hypertension was taken as reported in the electronic health record. Categories untreated hypertension and treated hypertension were grouped as arterial hypertension. | Electronic health record |
|                      | Left ventricular function:  | [%]                                 | Left ventricular function was available in different stages: good > 50 %, medium 31-50 %, bad 21-30 %, and very bad ≤ 20 %.                                           | Electronic health record |

|                   |                                      |               |                                                                                                                                                                         |                          |
|-------------------|--------------------------------------|---------------|-------------------------------------------------------------------------------------------------------------------------------------------------------------------------|--------------------------|
|                   | Logistic EUROSCORE                   |               | EUROSCORE as defined by Eur J Cardiothorac Surg. 2012 41(4):734.                                                                                                        | Electronic health record |
|                   | NYHA                                 | Categorical   | NYHA classification in the categories I, II, II-III, III, and IV as defined by the New York Heart Association.                                                          | Electronic health record |
|                   | Peripheral artery disease            | Binary yes/no | A reported peripheral artery disease in the electronic health record.                                                                                                   | Electronic health record |
|                   | Pulmonary arterial hypertension      | Binary yes/no | A reported pulmonary hypertension as reported in the electronic health record.                                                                                          | Electronic health record |
|                   | Systolic Arterial Pressure           | [mmHg]        | Systolic arterial pressure defined as the measured blood pressure on admission to the ICU.                                                                              | Electronic patient char  |
|                   | <b>Laboratory parameters</b>         |               |                                                                                                                                                                         |                          |
| <b>Laboratory</b> | Serum creatinine                     | [mg/dl]       | Urea as measured during stay in 12 h intervals and reported in the laboratory software.                                                                                 | Laboratory software      |
|                   | Max. creatinine on ICU               | [mg/dl]       | Max. serum creatinine during the ICU stay as measured in the hospital laboratory.                                                                                       | Laboratory software      |
|                   | (Preoperative) creatinine            | [mg/dl]       | Serum creatinine measurement at patient hospital admission.                                                                                                             | Laboratory software      |
|                   | Estimated glomerular filtration rate | [mL/min]      | Glomerular filtration rate was estimated with the CKD-EPI formula of the 'chronic kidney disease epidemiology collaboration' and calculated in the laboratory software. | Laboratory software      |
|                   | Hemoglobin                           | [g/dl]        | Hemoglobin as measured during stay in 12 h intervals and reported in the laboratory software.                                                                           | Laboratory software      |
|                   | Lactate                              | [mg/dl]       | Serumlactate as measured during stay in 12 h intervals and reported in the laboratory software.                                                                         | Laboratory software      |

|                            |                                                     |         |                                                                                                                                  |                          |
|----------------------------|-----------------------------------------------------|---------|----------------------------------------------------------------------------------------------------------------------------------|--------------------------|
|                            | Leucocytes                                          | [/nl]   | Leucocytes as measured during stay in 12 h intervals and reported in the laboratory software.                                    | Laboratory software      |
|                            | Thrombocytes                                        | [/nl]   | Thrombocytes as measured during stay in 12 h intervals and reported in the laboratory software.                                  | Laboratory software      |
|                            | Urea                                                | [mg/dl] | Urea as measured during stay in 12 h intervals and reported in the laboratory software.                                          | Laboratory software      |
| <b>Surgical parameters</b> |                                                     |         |                                                                                                                                  |                          |
| <b>Surgical parameters</b> | Aortic clamp time                                   | [min]   | Aortic cross clamp time was defined as time from the clamping start to release of the aorta.                                     | Electronic health record |
|                            | Bypass time                                         | [min]   | Cardiopulmonary bypass time was defined as time on cardiopulmonary bypass.                                                       | Electronic health record |
|                            | Intraoperative blood transfusion                    | [mL]    | Total volume of erythrocytes concentrate which was substituted during surgery.                                                   | Electronic health record |
|                            | Intraoperative fresh-frozen plasma substitution     | [mL]    | Total volume of fresh-frozen plasma which was substituted during surgery.                                                        | Electronic health record |
|                            | Intraoperative thrombocyte concentrate substitution | [mL]    | Total volume of thrombocyte concentrates which was substituted during surgery.                                                   | Electronic health record |
|                            | Surgery time                                        | [min]   | Surgery time was defined as time from skin cut until skin suture.                                                                | Electronic health record |
| <b>ICU parameters</b>      |                                                     |         |                                                                                                                                  |                          |
| <b>ICU</b>                 | Drain losses                                        | [ml]    | Defined as the cumulative volume lost over indwelling drains measured at bedside and documented in the electronic patient chart. | Electronic patient chart |

Drug Safety - Renal safety of hydroxyethyl starch after cardiac surgery

|                   |                                 |               |                                                                                                                                                                                                                                                                 |                          |
|-------------------|---------------------------------|---------------|-----------------------------------------------------------------------------------------------------------------------------------------------------------------------------------------------------------------------------------------------------------------|--------------------------|
|                   | Mean arterial pressure          | [mmHg]        | Measured at bedside and taken in 12 h intervals as reported in the electronic patient chart.                                                                                                                                                                    | Electronic patient chart |
|                   | Postoperative blood transfusion | [ml]          | Defined as the cumulate volume of erythrocyte concentrates administered postoperatively.                                                                                                                                                                        | Electronic patient chart |
|                   | Ventilation time                | [min]         | Time patient was mechanically ventilated on ICU until extubation.                                                                                                                                                                                               | Electronic patient chart |
|                   | Systolic arterial pressure      | [mmHg]        | Measured at bedside and taken in 12 h intervals as reported in the electronic patient chart.                                                                                                                                                                    | Electronic patient chart |
|                   | Urine output                    | [ml]          | Urine output during ICU stay in ml/h. Measurements were summed up in 12 h intervals.                                                                                                                                                                            | Electronic patient chart |
|                   | <b>Medication</b>               |               |                                                                                                                                                                                                                                                                 |                          |
| <b>Medication</b> | Catecholamine                   | Binary yes/no | The administration of noradrenaline, adrenaline, dobutamine during the ICU stay was grouped as binary indicator catecholamine.                                                                                                                                  | Electronic patient chart |
|                   | HES dose                        | [mL]          | The administered volume of HES. HES was used as a 130/0.42 solution                                                                                                                                                                                             | Electronic patient chart |
|                   | Crystalloid dose                | [mL]          | The total dose of administered crystalloid infusion (ringer solution)                                                                                                                                                                                           | Electronic patient chart |
|                   | Furosemide                      | Binary yes/no | Defined as the administration of furosemide as reported in the patient chart during the ICU stay                                                                                                                                                                | Electronic patient chart |
|                   | Mannitol                        | Binary yes/no | Defined as the administration of mannitol as a binary indicator                                                                                                                                                                                                 | Electronic patient chart |
|                   | Nephrotoxic drugs               | Binary yes/no | The administration of vancomycin, gentamicin, tobramycin, amikacin, piperacillin/tazobactam, colistin, cotrimoxazole, lithium, acyclovir, tacrolimus, ciclosporine, etoricoxib, diclofenac, and ibuprofen was defined as the binary indicator nephrotoxic drugs | Electronic patient chart |

**Abbreviations:** HES: Hydroxyethylstarch | ICU: Intensive Care Unit

**Table S2:** STROBE Statement—checklist of items that should be included in reports of observational studies

|                              | <b>Item No</b> | <b>Recommendation</b>                                                                                                                                                                                                                                                                                                                                                                                                                                                          | <b>Page No</b>     |
|------------------------------|----------------|--------------------------------------------------------------------------------------------------------------------------------------------------------------------------------------------------------------------------------------------------------------------------------------------------------------------------------------------------------------------------------------------------------------------------------------------------------------------------------|--------------------|
| <b>Title and abstract</b>    | 1              | (a) Indicate the study's design with a commonly used term in the title or the abstract                                                                                                                                                                                                                                                                                                                                                                                         | 1                  |
|                              |                | (b) Provide in the abstract an informative and balanced summary of what was done and what was found                                                                                                                                                                                                                                                                                                                                                                            | 2                  |
| <b>Introduction</b>          |                |                                                                                                                                                                                                                                                                                                                                                                                                                                                                                |                    |
| Background/rationale         | 2              | Explain the scientific background and rationale for the investigation being reported                                                                                                                                                                                                                                                                                                                                                                                           | 4                  |
| Objectives                   | 3              | State specific objectives, including any prespecified hypotheses                                                                                                                                                                                                                                                                                                                                                                                                               | 4                  |
| <b>Methods</b>               |                |                                                                                                                                                                                                                                                                                                                                                                                                                                                                                |                    |
| Study design                 | 4              | Present key elements of study design early in the paper                                                                                                                                                                                                                                                                                                                                                                                                                        | 5                  |
| Setting                      | 5              | Describe the setting, locations, and relevant dates, including periods of recruitment, exposure, follow-up, and data collection                                                                                                                                                                                                                                                                                                                                                | 5                  |
| Participants                 | 6              | (a) <i>Cohort study</i> —Give the eligibility criteria, and the sources and methods of selection of participants. Describe methods of follow-up<br><br><i>Case-control study</i> —Give the eligibility criteria, and the sources and methods of case ascertainment and control selection. Give the rationale for the choice of cases and controls<br><br><i>Cross-sectional study</i> —Give the eligibility criteria, and the sources and methods of selection of participants | 5-6                |
|                              |                | (b) <i>Cohort study</i> —For matched studies, give matching criteria and number of exposed and unexposed<br><br><i>Case-control study</i> —For matched studies, give matching criteria and the number of controls per case                                                                                                                                                                                                                                                     | 5                  |
| Variables                    | 7              | Clearly define all outcomes, exposures, predictors, potential confounders, and effect modifiers. Give diagnostic criteria, if applicable                                                                                                                                                                                                                                                                                                                                       | 6-8, supplementary |
| Data sources/<br>measurement | 8*             | For each variable of interest, give sources of data and details of methods of assessment (measurement). Describe comparability of                                                                                                                                                                                                                                                                                                                                              | 6-8, supplementary |

|                        |     |                                                                                                                                                                                                                                                                                                                   |                     |
|------------------------|-----|-------------------------------------------------------------------------------------------------------------------------------------------------------------------------------------------------------------------------------------------------------------------------------------------------------------------|---------------------|
|                        |     | assessment methods if there is more than one group                                                                                                                                                                                                                                                                |                     |
| Bias                   | 9   | Describe any efforts to address potential sources of bias                                                                                                                                                                                                                                                         | 7-9                 |
| Study size             | 10  | Explain how the study size was arrived at                                                                                                                                                                                                                                                                         | 8                   |
| Quantitative variables | 11  | Explain how quantitative variables were handled in the analyses. If applicable, describe which groupings were chosen and why                                                                                                                                                                                      | 8                   |
| Statistical methods    | 12  | (a) Describe all statistical methods, including those used to control for confounding                                                                                                                                                                                                                             | 8-9                 |
|                        |     | (b) Describe any methods used to examine subgroups and interactions                                                                                                                                                                                                                                               | 8-9                 |
|                        |     | (c) Explain how missing data were addressed                                                                                                                                                                                                                                                                       | 8-9                 |
|                        |     | (d) <i>Cohort study</i> —If applicable, explain how loss to follow-up was addressed<br><br><i>Case-control study</i> —If applicable, explain how matching of cases and controls was addressed<br><br><i>Cross-sectional study</i> —If applicable, describe analytical methods taking account of sampling strategy | n/a                 |
|                        |     | (e) Describe any sensitivity analyses                                                                                                                                                                                                                                                                             | 8-9. supplementary  |
| <b>Results</b>         |     |                                                                                                                                                                                                                                                                                                                   |                     |
| Participants           | 13* | (a) Report numbers of individuals at each stage of study—eg numbers potentially eligible, examined for eligibility, confirmed eligible, included in the study, completing follow-up, and analysed                                                                                                                 | 9-10, table 1       |
|                        |     | (b) Give reasons for non-participation at each stage                                                                                                                                                                                                                                                              | n/a                 |
|                        |     | (c) Consider use of a flow diagram                                                                                                                                                                                                                                                                                | n/a                 |
| Descriptive data       | 14* | (a) Give characteristics of study participants (eg demographic, clinical, social) and information on exposures and potential confounders                                                                                                                                                                          | 9-10, supplementary |
|                        |     | (b) Indicate number of participants with missing data for each variable of interest                                                                                                                                                                                                                               | 8, 9-10             |
|                        |     | (c) <i>Cohort study</i> —Summarise follow-up time (eg, average and total amount)                                                                                                                                                                                                                                  | n/a                 |
| Outcome data           | 15* | <i>Cohort study</i> —Report numbers of outcome events or summary measures over time                                                                                                                                                                                                                               | 10-11               |

|                          |    |                                                                                                                                                                                                              |                   |
|--------------------------|----|--------------------------------------------------------------------------------------------------------------------------------------------------------------------------------------------------------------|-------------------|
|                          |    | <i>Case-control study</i> —Report numbers in each exposure category, or summary measures of exposure                                                                                                         | n/a               |
|                          |    | <i>Cross-sectional study</i> —Report numbers of outcome events or summary measures                                                                                                                           | 10-11             |
| Main results             | 16 | (a) Give unadjusted estimates and, if applicable, confounder-adjusted estimates and their precision (eg, 95% confidence interval). Make clear which confounders were adjusted for and why they were included | 10-11             |
|                          |    | (b) Report category boundaries when continuous variables were categorized                                                                                                                                    | -                 |
|                          |    | (c) If relevant, consider translating estimates of relative risk into absolute risk for a meaningful time period                                                                                             | n/a               |
| Other analyses           | 17 | Report other analyses done—eg analyses of subgroups and interactions, and sensitivity analyses                                                                                                               | 10, supplementary |
| <b>Discussion</b>        |    |                                                                                                                                                                                                              |                   |
| Key results              | 18 | Summarise key results with reference to study objectives                                                                                                                                                     | 12-13             |
| Limitations              | 19 | Discuss limitations of the study, taking into account sources of potential bias or imprecision. Discuss both direction and magnitude of any potential bias                                                   | 13                |
| Interpretation           | 20 | Give a cautious overall interpretation of results considering objectives, limitations, multiplicity of analyses, results from similar studies, and other relevant evidence                                   | 12-15             |
| Generalisability         | 21 | Discuss the generalisability (external validity) of the study results                                                                                                                                        | 13-15             |
| <b>Other information</b> |    |                                                                                                                                                                                                              |                   |
| Funding                  | 22 | Give the source of funding and the role of the funders for the present study and, if applicable, for the original study on which the present article is based                                                | Title page        |



**Tab. S3:** Matching table describing cohort generation by patient characteristics before and after matching (sensitivity analysis).

| <b>Matching variable (mean or proportion)</b> | <b>HES before</b> | <b>Control before</b> | <b>HES matched</b> | <b>Control matched</b> | <b>Percent Balance Improvement</b> |
|-----------------------------------------------|-------------------|-----------------------|--------------------|------------------------|------------------------------------|
| Age                                           | 69.85             | 69.05                 | 69.78              | 69.79                  | 98.57 %                            |
| Sex                                           | 0.73              | 0.77                  | 0.73               | 0.72                   | 90.29 %                            |
| Body-mass index                               | 28.49             | 27.85                 | 28.56              | 27.97                  | 9.40 %                             |
| Preoperative serum creatinine                 | 1.09              | 0.95                  | 1.06               | 1.05                   | 93.16 %                            |
| EUROSCORE                                     | 6.99              | 6.37                  | 6.91               | 6.99                   | 87.39 %                            |
| Left ventricular function                     | 1.47              | 1.4                   | 1.46               | 1.47                   | 71.59 %                            |
| Atrial fibrillation                           | 0.22              | 0.14                  | 0.21               | 0.23                   | 66.78 %                            |
| Diabetes                                      | 0.36              | 0.34                  | 0.36               | 0.34                   | 31.02 %                            |
| Catecholamines                                | 0.62              | 0.77                  | 0.63               | 0.64                   | 98.34 %                            |
| Nephrotoxic drugs                             | 0.06              | 0.08                  | 0.06               | 0.06                   | 86.54 %                            |
| Furosemide                                    | 0.96              | 0.97                  | 0.96               | 0.96                   | 16.71 %                            |
| Mannitol                                      | 0.01              | 0                     | 0.01               | 0.01                   | 36.04 %                            |
| Drain-losses                                  | 882.95            | 1158.89               | 889.81             | 878.91                 | 96.05 %                            |
| Mean arterial pressure                        | 109.78            | 109.58                | 110.06             | 110.41                 | -72.50 %                           |
| Systolic blood pressure                       | 159.15            | 159.49                | 159.11             | 158.59                 | -55.11 %                           |
| Intraoperative blood transfusion              | 200.29            | 349.69                | 200.3              | 204.94                 | 96.89 %                            |
| All blood transfusion                         | 282.07            | 353.46                | 284.43             | 305.69                 | 70.22 %                            |
| Surgery time                                  | 197.72            | 223.87                | 199.85             | 199.96                 | 99.58 %                            |

**Tab. S4:** Propensity-weighted and propensity-matched analysis for sensitivity analysis.

| <b>Propensity-score weighted analysis</b><br>(N = 2188) | <b>Odds Ratio</b> | <b>Confidence Interval 95 %</b> |
|---------------------------------------------------------|-------------------|---------------------------------|
| Hydroxyethylstarch infusion <sup>a</sup>                | 0.93              | [0.89-0.97]                     |
| <b>Propensity-score matched analysis</b><br>(N = 1014)  | <b>Odds Ratio</b> | <b>Confidence Interval 95 %</b> |
| Hydroxyethylstarch infusion <sup>a</sup>                | 0.85              | [0.77-0.94]                     |

a: Per 500 mL

**Analysis:** In particular, the propensity-weighted analysis was based on average treatment effect (ATE) weights assigned to groups with HES ( $1/e^{\hat{x}}$ ) or without HES ( $1/(1-e^{\hat{x}})$ ). The propensity-matched analysis was based on a linear logit model to select HES patients and controls at a 3:1 ratio with a caliper of 0.1 in a nearest neighbour matching.

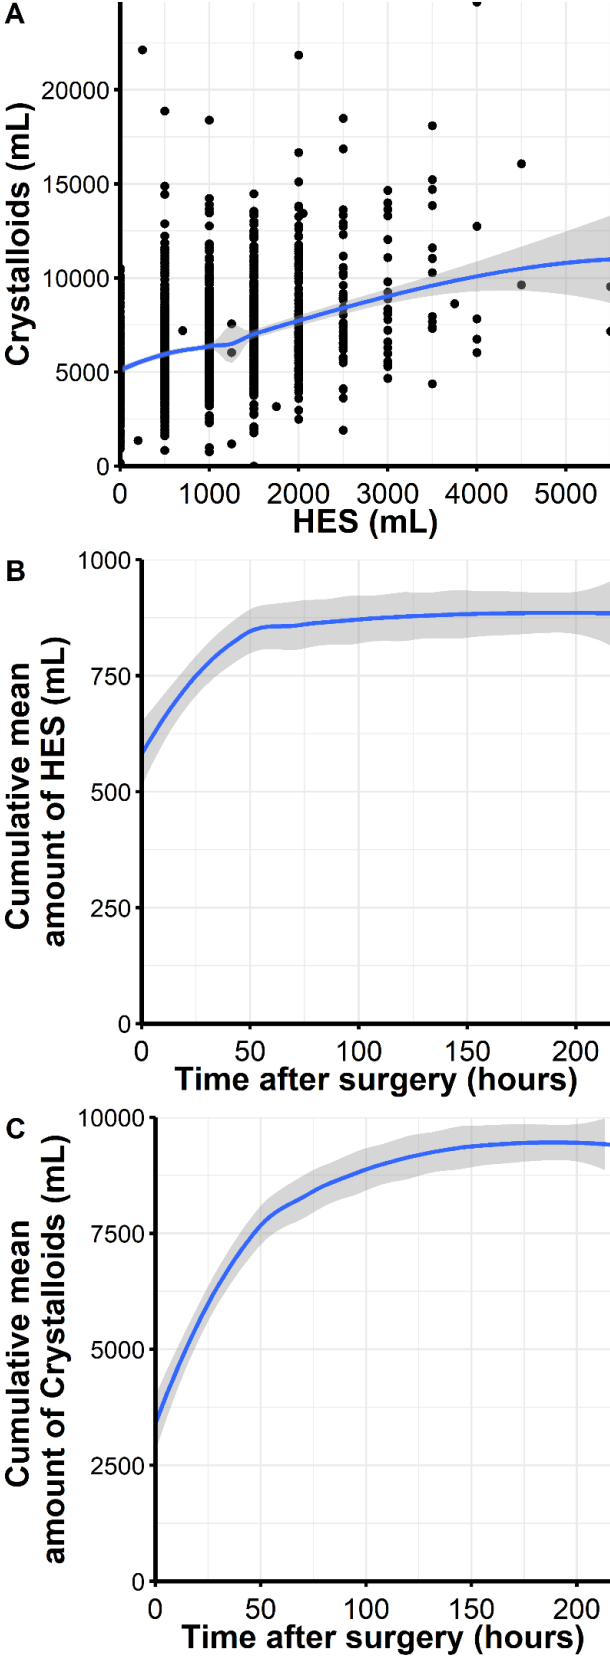

Fig. S1 Scatter plot of crystalloid and hydroxyethylstarch 130/0.42 doses administered after cardiac surgery per patient and the cumulative dosage of HES and crystalloids.

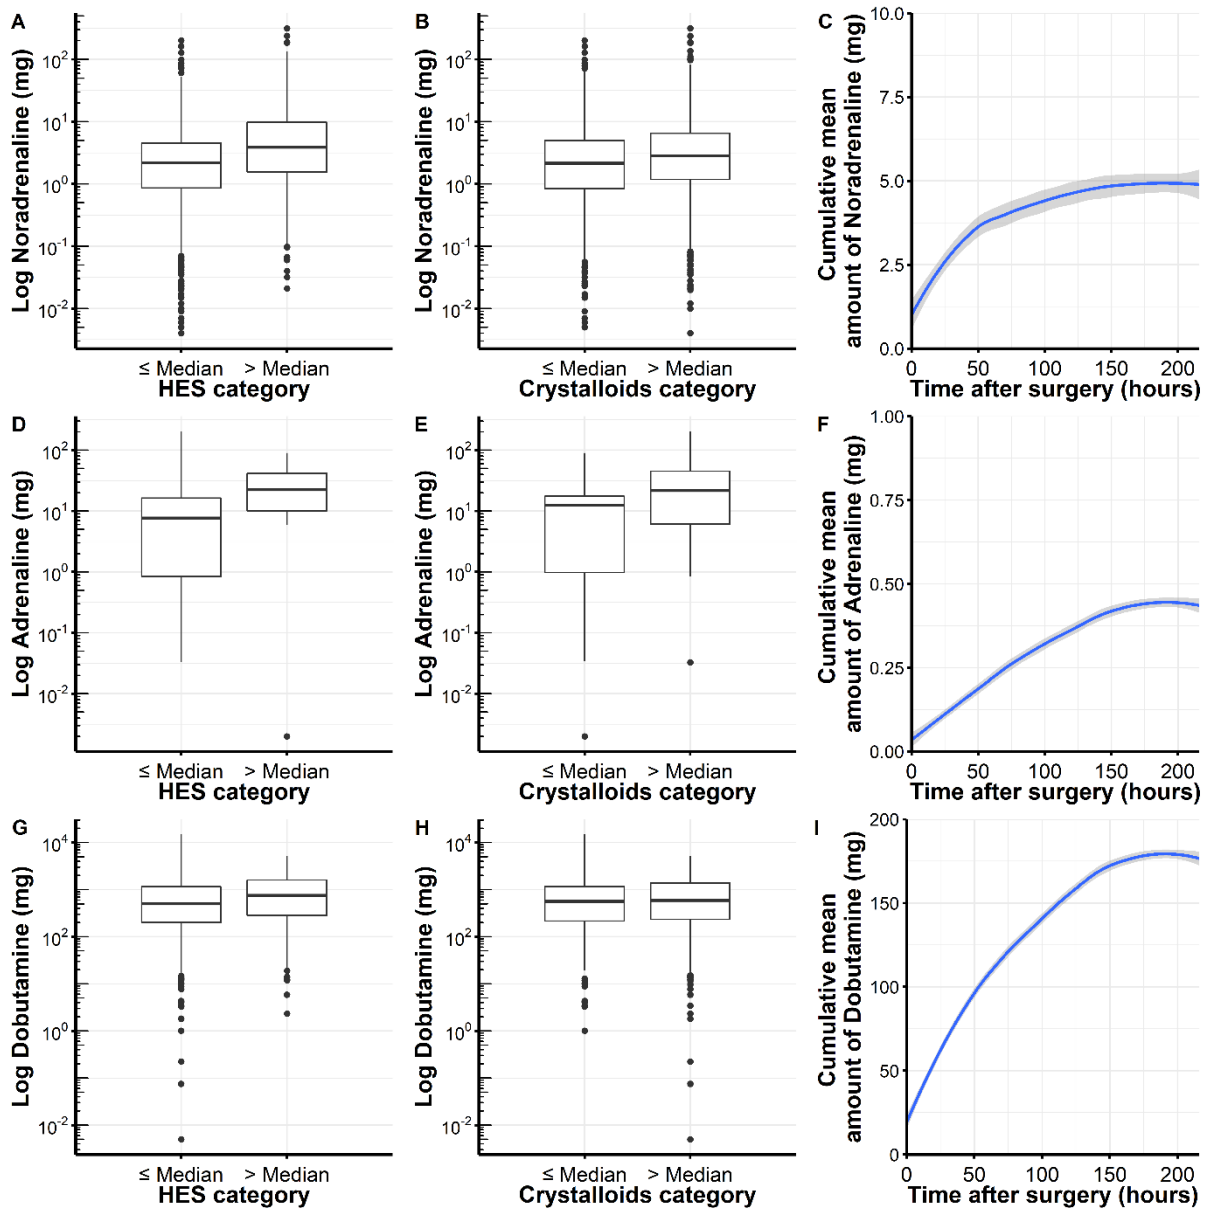

**Fig. S2:** Detailed information on vasopressor and inotrope doses and timing of administration on the ICU. The HES and crystalloid cohorts are divided according to the administered dose in  $\leq$  median dose and  $>$  median dose.

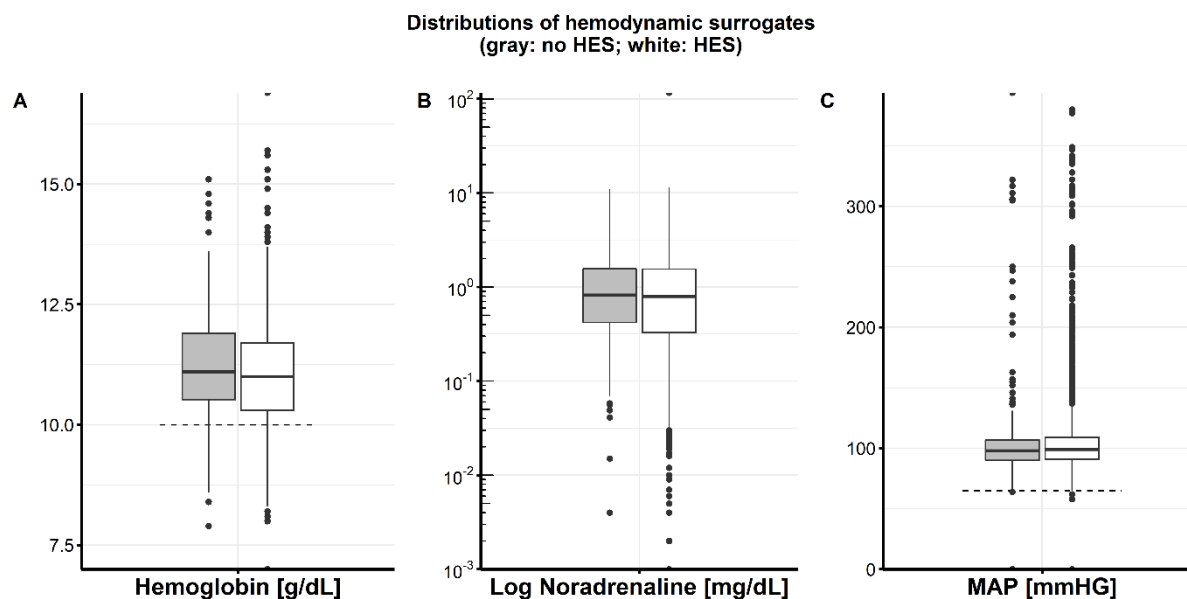

**Fig. S3:** Hemodynamic surrogates of the HES and crystalloid cohort at admission on the ICU. Gray: Crystalloid | White: HES

**Tab. S5:** Dose and postoperative administration time points of patients receiving hydroxyethylstarch 130/0.42

| HES dosage                               | Number of patients |
|------------------------------------------|--------------------|
| < 1000 mL                                | 1292               |
| 1000-2000 ml                             | 483                |
| > 2000 ml                                | 99                 |
| <b>Cumulative HES Dosage per patient</b> |                    |
| 1091 mL ± 649 mL                         |                    |
| <b>Time of HES administration</b>        |                    |
| < 24 h after surgery                     | 1839               |
| 24-72 h after surgery                    | 24                 |
| >72 h after surgery                      | 11                 |

Abbreviations: HES: Hydroxyethylstarch

**Tab. S6:** Associations of HES with bleeding incidents and reoperations after multivariate adjustment

|                | Odds Ratio for bleeding    | Confidence interval | p-value |
|----------------|----------------------------|---------------------|---------|
| HES per 500 ml | 0.93                       | [0.76, 1.13]        | 0.466   |
|                | Odds Ratio for reoperation | Confidence interval | p-value |
| HES per 500 ml | 0.94                       | [0.77, 1.13]        | 0.506   |

**Tab. S7:** All estimates selected by the LASSO-framework, corresponding standard errors, p-values, and confidence intervals of the cross-sectional acute kidney injury model. All values are rounded to the last digit.

| Co-variate                                    | Estimate | Standard error | z value | p value | 95 % Confidence interval |
|-----------------------------------------------|----------|----------------|---------|---------|--------------------------|
| Age <sup>a</sup>                              | 0.120    | ± 0.057        | 2.111   | 0.035   | [0.01, 0.23]             |
| Atrial fibrillation                           | 0.592    | ± 0.138        | 4.274   | <0.001  | [0.32, 0.86]             |
| Body mass index                               | 0.006    | ± 0.005        | 1.255   | 0.210   | [0.00, 0.02]             |
| Crystalloid infusion <sup>b</sup>             | -0.024   | ± 0.012        | -2.024  | 0.043   | [-0.05, -0.00*]          |
| Diabetes                                      | 0.341    | ± 0.103        | 3.325   | <0.001  | [0.14, 0.54]             |
| Furosemide                                    | 0.264    | ± 0.284        | 0.930   | 0.352   | [-0.28, 0.84]            |
| Hydroxyethylstarch infusion <sup>c</sup>      | -0.115   | ± 0.040        | -2.897  | 0.004   | [-0.19, -0.04]           |
| Intraoperative blood transfusion <sup>d</sup> | 0.037    | ± 0.037        | 0.996   | 0.319   | [-0.04, 0.11]            |
| Left ventricular function                     | 0.088    | ± 0.079        | 1.111   | 0.266   | [-0.07, 0.24]            |
| Mannitol                                      | 1.028    | ± 1.135        | 0.906   | 0.365   | [-0.92, 4.02]            |
| Mean arterial pressure <sup>e</sup>           | -0.041   | ± 0.020        | -2.013  | 0.044   | [-0.08, -0.00**]         |
| Nephrotoxic drugs                             | 0.645    | ± 0.203        | 3.173   | 0.002   | [0.24, 1.04]             |
| Postoperative blood transfusion <sup>f</sup>  | 0.155    | ± 0.031        | 4.938   | <0.001  | [0.10, 0.22]             |
| Pre-operative serum creatinine <sup>g</sup>   | 0.131    | ± 0.020        | 6.590   | <0.001  | [0.09, 0.17]             |
| Sex                                           | -0.248   | ± 0.129        | -1.920  | 0.055   | [-0.50, 0.01]            |
| Surgery time <sup>h</sup>                     | 0.192    | ± 0.014        | 13.251  | <0.001  | [0.16, 0.22]             |

**Legend:** a: Per 10 years | b: Per 500 mL | c: Per 500 mL | d: Per 300 mL | e: Per 10 mmHg | f: Per 300 mL | g: Per 10 mg/dl | h: Per 15 min | \* = -0.001 | \*\* = -0.003

**Tab. S8:** All estimates selected by the LASSO-framework, corresponding standard errors, p-values, and confidence intervals of the cross-sectional mortality model. All values are rounded to the last digit.

| Co-variate                                    | Estimate | Standard error | z value | p value | 95 % Confidence interval |
|-----------------------------------------------|----------|----------------|---------|---------|--------------------------|
| Age <sup>a</sup>                              | 0.497    | 0.245          | 2.027   | 0.04    | [0.03, 0.99]             |
| Atrial fibrillation                           | 1.018    | 0.304          | 3.346   | <0.001  | [0.41, 1.61]             |
| Crystalloid infusion <sup>b</sup>             | 0.055    | 0.026          | 2.141   | 0.03    | [0.00*, 0.10]            |
| EuroSCORE                                     | 0.133    | 0.06           | 2.340   | 0.02    | [0.02, 0.24]             |
| Hydroxyethylstarch infusion <sup>c</sup>      | 0.053    | 0.091          | 0.553   | 0.580   | [-0.13, 0.22]            |
| Intraoperative blood transfusion <sup>d</sup> | 0.047    | 0.071          | 0.658   | 0.510   | [-0.10, 0.18]            |
| Left ventricular function                     | 0.314    | 0.186          | 1.688   | 0.09    | [-0.06, 0.67]            |
| Nephrotoxic drugs                             | 0.416    | 0.371          | 1.119   | 0.263   | [-0.33, 1.12]            |
| Postoperative blood transfusion <sup>e</sup>  | 0.260    | 0.042          | 6.195   | <0.001  | [-0.18, 0.35]            |
| Pre-operative serum creatinine <sup>f</sup>   | 0.010    | 0.030          | 0.335   | 0.74    | [-0.05, 0.07]            |
| Systolic arterial pressure <sup>g</sup>       | -0.114   | 0.081          | -1.411  | 0.16    | [-0.28, 0.04]            |

**Legend:** a: Per 10 years | b: Per 500 mL | c: Per 500 mL | d: Per 300 mL | e: Per 300 ml | f: Per 10 mg/dl | g: Per 10 mmHg | \* = 0.003

**Tab. S9:** All estimates of the longitudinal renal function trajectories, corresponding standard errors, and p-values.

| <b>Co-variate</b>                                            | <b>Estimate</b> | <b>Standard error</b> | <b>df</b> | <b>t value</b> | <b>p value</b> |
|--------------------------------------------------------------|-----------------|-----------------------|-----------|----------------|----------------|
| Age                                                          | -7.567e-01      | ± 2.240e-02           | 2.012e+03 | -33.78         | < 0.001        |
| Aortic cross clamp time                                      | 2.751e-02       | ± 1.038e-02           | 1.993e+03 | 2.650          | 0.008          |
| Crystalloid infusion                                         | 2.653e-04       | ± 8.678e-05           | 2.093e+03 | 3.058          | 0.002          |
| Diabetes                                                     | -5.965e-01      | ± 1.658e-01           | 1.991e+03 | -3.597         | < 0.001        |
| EuroSCORE (logarithmic)                                      | 1.675e-02       | ± 2.415e-02           | 1.985e+03 | 0.694          | 0.488          |
| Hydroxyethylstarch infusion                                  | -1.417e-03      | ± 2.477e-04           | 9.033e+03 | -5.720         | < 0.001        |
| Intraoperative blood transfusion                             | -2.797e-05      | ± 4.466e-04           | 1.989e+03 | -0.063         | 0.950          |
| Left ventricular function                                    | 3.420e-01       | ± 2.778e-01           | 1.983e+03 | 1.231          | 0.218          |
| Postoperative blood transfusion                              | -6.049e-04      | ± 3.534e-04           | 2.003e+03 | -1.712         | 0.087          |
| Postoperative Days                                           | -1.540e+00      | ± 7.276e-02           | 2.669e+03 | -21.16         | < 0.001        |
| Pre-operative serum creatinine                               | -2.642e+01      | ± 5.955e-01           | 2.299e+03 | -44.36         | < 0.001        |
| Sex                                                          | 6.022e+00       | ± 4.958e-01           | 1.988e+03 | 12.15          | < 0.001        |
| Surgery time                                                 | -8.608e-03      | ± 4.061e-03           | 1.981e+03 | -2.120         | 0.034          |
| Transfusion of platelets                                     | 2.058e-03       | ± 8.097e-04           | 1.983e+03 | 2.542          | 0.011          |
| Urea                                                         | -3.225e-01      | ± 5.484e-03           | 1.105e+04 | -58.80         | < 0.001        |
| Urine output                                                 | 2.207e-04       | ± 4.059e-05           | 1.147e+04 | 5.438          | < 0.001        |
| Ventilation time                                             | -2.023e-05      | ± 6.846e-05           | 1.994e+03 | -0.296         | 0.768          |
| Postoperative Days: Hydroxyethylstarch infusion <sup>c</sup> | 4.282e-04       | ± 6.274e-05           | 2.728e+03 | 6.824          | < 0.001        |
